# Supplementary material for: Outcomes of Community-Based Systematic Screening of Household Contacts of Patients with Multidrug-Resistant Tuberculosis in Myanmar
Source: PubMed Central journal article supplement (PMC7157714; doi:10.3390/tropicalmed5010002), 2019-12-25
Supplement: tropicalmed-05-00002-s001.pdf [file tropicalmed-05-00002-s001.pdf]

Annex S1: Household contact screening register used in the community-based MDR-TB Care Project in 33 townships

| Reg. No. | Reg. Date<br>dd/mm/yy                                            | Name |                                                          | Address & Phone No:                                                                                                           |  |  |                                                                                                                                                                                                                                                                                       | Symptom                                                                                                                                                                                                                                                                               | Case found at                                                                                                                            | Index case Reg No.                                                                                                | Risk Factor                                                                                                | HIV Date                                                                                     | Sputum Date                                                                                  | Antibiotic trial             |
|----------|------------------------------------------------------------------|------|----------------------------------------------------------|-------------------------------------------------------------------------------------------------------------------------------|--|--|---------------------------------------------------------------------------------------------------------------------------------------------------------------------------------------------------------------------------------------------------------------------------------------|---------------------------------------------------------------------------------------------------------------------------------------------------------------------------------------------------------------------------------------------------------------------------------------|------------------------------------------------------------------------------------------------------------------------------------------|-------------------------------------------------------------------------------------------------------------------|------------------------------------------------------------------------------------------------------------|----------------------------------------------------------------------------------------------|----------------------------------------------------------------------------------------------|------------------------------|
| Township | Referral type                                                    | Age  | Sex                                                      | Refer from                                                                                                                    |  |  |                                                                                                                                                                                                                                                                                       | Select more than one                                                                                                                                                                                                                                                                  |                                                                                                                                          | Relationship                                                                                                      | Select more than one                                                                                       | Result                                                                                       | Result                                                                                       |                              |
|          |                                                                  |      |                                                          |                                                                                                                               |  |  |                                                                                                                                                                                                                                                                                       | <input type="checkbox"/> Cough <input type="checkbox"/> Fever <input type="checkbox"/> Weight Loss<br><input type="checkbox"/> Blood Stained Sputum <input type="checkbox"/> Night Sweat<br><input type="checkbox"/> Lymph Node Enlargement<br><input type="checkbox"/> Other : _____ | <input type="checkbox"/> HE<br><input type="checkbox"/> TB CT<br><input type="checkbox"/> MDRTB CT<br><input type="checkbox"/> Community |                                                                                                                   | <input type="checkbox"/> HIV<br><input type="checkbox"/> DM<br><input type="checkbox"/> Past History of TB | <input type="checkbox"/> Not Done<br><input type="checkbox"/> Done<br>Date ...../...../..... | <input type="checkbox"/> Not Done<br><input type="checkbox"/> Done<br>Date ...../...../..... | <input type="checkbox"/> YES |
|          | <input type="checkbox"/> Self<br><input type="checkbox"/> Sputum |      | <input type="checkbox"/> M<br><input type="checkbox"/> F | <input type="checkbox"/> Vol<br><input type="checkbox"/> GP<br><input type="checkbox"/> Phar<br><input type="checkbox"/> Self |  |  |                                                                                                                                                                                                                                                                                       |                                                                                                                                                                                                                                                                                       | <input type="checkbox"/> Household member<br><input type="checkbox"/> Non-household member                                               | <input type="checkbox"/> Under 5<br><input type="checkbox"/> TB contact<br><input type="checkbox"/> MDRTB contact | <input type="checkbox"/> Negative<br><input type="checkbox"/> Positive<br>Code.....                        | <input type="checkbox"/> Negative<br><input type="checkbox"/> Positive                       | <input type="checkbox"/> NO                                                                  |                              |
|          |                                                                  |      |                                                          |                                                                                                                               |  |  | <input type="checkbox"/> Cough <input type="checkbox"/> Fever <input type="checkbox"/> Weight Loss<br><input type="checkbox"/> Blood Stained Sputum <input type="checkbox"/> Night Sweat<br><input type="checkbox"/> Lymph Node Enlargement<br><input type="checkbox"/> Other : _____ | <input type="checkbox"/> HE<br><input type="checkbox"/> TB CT<br><input type="checkbox"/> MDRTB CT<br><input type="checkbox"/> Community                                                                                                                                              |                                                                                                                                          | <input type="checkbox"/> HIV<br><input type="checkbox"/> DM<br><input type="checkbox"/> Past History of TB        | <input type="checkbox"/> Not Done<br><input type="checkbox"/> Done<br>Date ...../...../.....               | <input type="checkbox"/> Not Done<br><input type="checkbox"/> Done<br>Date ...../...../..... | <input type="checkbox"/> YES                                                                 |                              |
|          | <input type="checkbox"/> Self<br><input type="checkbox"/> Sputum |      | <input type="checkbox"/> M<br><input type="checkbox"/> F | <input type="checkbox"/> Vol<br><input type="checkbox"/> GP<br><input type="checkbox"/> Phar<br><input type="checkbox"/> Self |  |  |                                                                                                                                                                                                                                                                                       |                                                                                                                                                                                                                                                                                       | <input type="checkbox"/> Household member<br><input type="checkbox"/> Non-household member                                               | <input type="checkbox"/> Under 5<br><input type="checkbox"/> TB contact<br><input type="checkbox"/> MDRTB contact | <input type="checkbox"/> Negative<br><input type="checkbox"/> Positive<br>Code.....                        | <input type="checkbox"/> Negative<br><input type="checkbox"/> Positive                       | <input type="checkbox"/> NO                                                                  |                              |
|          |                                                                  |      |                                                          |                                                                                                                               |  |  | <input type="checkbox"/> Cough <input type="checkbox"/> Fever <input type="checkbox"/> Weight Loss<br><input type="checkbox"/> Blood Stained Sputum <input type="checkbox"/> Night Sweat<br><input type="checkbox"/> Lymph Node Enlargement<br><input type="checkbox"/> Other : _____ | <input type="checkbox"/> HE<br><input type="checkbox"/> TB CT<br><input type="checkbox"/> MDRTB CT<br><input type="checkbox"/> Community                                                                                                                                              |                                                                                                                                          | <input type="checkbox"/> HIV<br><input type="checkbox"/> DM<br><input type="checkbox"/> Past History of TB        | <input type="checkbox"/> Not Done<br><input type="checkbox"/> Done<br>Date ...../...../.....               | <input type="checkbox"/> Not Done<br><input type="checkbox"/> Done<br>Date ...../...../..... | <input type="checkbox"/> YES                                                                 |                              |
|          | <input type="checkbox"/> Self<br><input type="checkbox"/> Sputum |      | <input type="checkbox"/> M<br><input type="checkbox"/> F | <input type="checkbox"/> Vol<br><input type="checkbox"/> GP<br><input type="checkbox"/> Phar<br><input type="checkbox"/> Self |  |  |                                                                                                                                                                                                                                                                                       |                                                                                                                                                                                                                                                                                       | <input type="checkbox"/> Household member<br><input type="checkbox"/> Non-household member                                               | <input type="checkbox"/> Under 5<br><input type="checkbox"/> TB contact<br><input type="checkbox"/> MDRTB contact | <input type="checkbox"/> Negative<br><input type="checkbox"/> Positive<br>Code.....                        | <input type="checkbox"/> Negative<br><input type="checkbox"/> Positive                       | <input type="checkbox"/> NO                                                                  |                              |
|          |                                                                  |      |                                                          |                                                                                                                               |  |  | <input type="checkbox"/> Cough <input type="checkbox"/> Fever <input type="checkbox"/> Weight Loss<br><input type="checkbox"/> Blood Stained Sputum <input type="checkbox"/> Night Sweat<br><input type="checkbox"/> Lymph Node Enlargement<br><input type="checkbox"/> Other : _____ | <input type="checkbox"/> HE<br><input type="checkbox"/> TB CT<br><input type="checkbox"/> MDRTB CT<br><input type="checkbox"/> Community                                                                                                                                              |                                                                                                                                          | <input type="checkbox"/> HIV<br><input type="checkbox"/> DM<br><input type="checkbox"/> Past History of TB        | <input type="checkbox"/> Not Done<br><input type="checkbox"/> Done<br>Date ...../...../.....               | <input type="checkbox"/> Not Done<br><input type="checkbox"/> Done<br>Date ...../...../..... | <input type="checkbox"/> YES                                                                 |                              |
|          | <input type="checkbox"/> Self<br><input type="checkbox"/> Sputum |      | <input type="checkbox"/> M<br><input type="checkbox"/> F | <input type="checkbox"/> Vol<br><input type="checkbox"/> GP<br><input type="checkbox"/> Phar<br><input type="checkbox"/> Self |  |  |                                                                                                                                                                                                                                                                                       |                                                                                                                                                                                                                                                                                       | <input type="checkbox"/> Household member<br><input type="checkbox"/> Non-household member                                               | <input type="checkbox"/> Under 5<br><input type="checkbox"/> TB contact<br><input type="checkbox"/> MDRTB contact | <input type="checkbox"/> Negative<br><input type="checkbox"/> Positive<br>Code.....                        | <input type="checkbox"/> Negative<br><input type="checkbox"/> Positive                       | <input type="checkbox"/> NO                                                                  |                              |
|          |                                                                  |      |                                                          |                                                                                                                               |  |  | <input type="checkbox"/> Cough <input type="checkbox"/> Fever <input type="checkbox"/> Weight Loss<br><input type="checkbox"/> Blood Stained Sputum <input type="checkbox"/> Night Sweat<br><input type="checkbox"/> Lymph Node Enlargement<br><input type="checkbox"/> Other : _____ | <input type="checkbox"/> HE<br><input type="checkbox"/> TB CT<br><input type="checkbox"/> MDRTB CT<br><input type="checkbox"/> Community                                                                                                                                              |                                                                                                                                          | <input type="checkbox"/> HIV<br><input type="checkbox"/> DM<br><input type="checkbox"/> Past History of TB        | <input type="checkbox"/> Not Done<br><input type="checkbox"/> Done<br>Date ...../...../.....               | <input type="checkbox"/> Not Done<br><input type="checkbox"/> Done<br>Date ...../...../..... | <input type="checkbox"/> YES                                                                 |                              |
|          | <input type="checkbox"/> Self<br><input type="checkbox"/> Sputum |      | <input type="checkbox"/> M<br><input type="checkbox"/> F | <input type="checkbox"/> Vol<br><input type="checkbox"/> GP<br><input type="checkbox"/> Phar<br><input type="checkbox"/> Self |  |  |                                                                                                                                                                                                                                                                                       |                                                                                                                                                                                                                                                                                       | <input type="checkbox"/> Household member<br><input type="checkbox"/> Non-household member                                               | <input type="checkbox"/> Under 5<br><input type="checkbox"/> TB contact<br><input type="checkbox"/> MDRTB contact | <input type="checkbox"/> Negative<br><input type="checkbox"/> Positive<br>Code.....                        | <input type="checkbox"/> Negative<br><input type="checkbox"/> Positive                       | <input type="checkbox"/> NO                                                                  |                              |

| TST                                                                                          | CXR Date                                                                                     | GeneXpert Date                                                                                                                | FNAC Date                                                                                    | Culture Date                                                                                 | DST Date                                                                                                                                                                                       | Conclusion/Treatment received                                                                                                                                                                       | Other/comment |
|----------------------------------------------------------------------------------------------|----------------------------------------------------------------------------------------------|-------------------------------------------------------------------------------------------------------------------------------|----------------------------------------------------------------------------------------------|----------------------------------------------------------------------------------------------|------------------------------------------------------------------------------------------------------------------------------------------------------------------------------------------------|-----------------------------------------------------------------------------------------------------------------------------------------------------------------------------------------------------|---------------|
| Result                                                                                       | Result                                                                                       | Result                                                                                                                        | Result                                                                                       | Result                                                                                       | Result                                                                                                                                                                                         |                                                                                                                                                                                                     | Result        |
| <input type="checkbox"/> Not Done<br><input type="checkbox"/> Done<br>Date ...../...../..... | <input type="checkbox"/> Not Done<br><input type="checkbox"/> Done<br>Date ...../...../..... | <input type="checkbox"/> Not Done<br><input type="checkbox"/> Done<br>Date ...../...../.....                                  | <input type="checkbox"/> Not Done<br><input type="checkbox"/> Done<br>Date ...../...../..... | <input type="checkbox"/> Not Done<br><input type="checkbox"/> Done<br>Date ...../...../..... | <input type="checkbox"/> Not Done<br><input type="checkbox"/> Done<br>Date ...../...../.....                                                                                                   | <input type="checkbox"/> TB Code _____<br><input type="checkbox"/> MDRTB Code _____<br><input type="checkbox"/> IPT Code _____<br><input type="checkbox"/> No TB<br><input type="checkbox"/> No IPT |               |
| Size mm .....                                                                                | <input type="checkbox"/> Normal<br><input type="checkbox"/> Abnormal                         | <input type="checkbox"/> MTB Not Detected<br><input type="checkbox"/> MTB Detected<br><input type="checkbox"/> Rif Resistance | <input type="checkbox"/> Negative<br><input type="checkbox"/> Positive                       | <input type="checkbox"/> Negative<br><input type="checkbox"/> Positive                       | <input type="checkbox"/> Resistant H <input type="checkbox"/> Resistant R<br><input type="checkbox"/> Resistant Z <input type="checkbox"/> Resistant E<br><input type="checkbox"/> Resistant S |                                                                                                                                                                                                     |               |
| <input type="checkbox"/> Not Done<br><input type="checkbox"/> Done<br>Date ...../...../..... | <input type="checkbox"/> Not Done<br><input type="checkbox"/> Done<br>Date ...../...../..... | <input type="checkbox"/> Not Done<br><input type="checkbox"/> Done<br>Date ...../...../.....                                  | <input type="checkbox"/> Not Done<br><input type="checkbox"/> Done<br>Date ...../...../..... | <input type="checkbox"/> Not Done<br><input type="checkbox"/> Done<br>Date ...../...../..... | <input type="checkbox"/> Not Done<br><input type="checkbox"/> Done<br>Date ...../...../.....                                                                                                   | <input type="checkbox"/> TB Code _____<br><input type="checkbox"/> MDRTB Code _____<br><input type="checkbox"/> IPT Code _____<br><input type="checkbox"/> No TB<br><input type="checkbox"/> No IPT |               |
| Size mm .....                                                                                | <input type="checkbox"/> Normal<br><input type="checkbox"/> Abnormal                         | <input type="checkbox"/> MTB Not Detected<br><input type="checkbox"/> MTB Detected<br><input type="checkbox"/> Rif Resistance | <input type="checkbox"/> Negative<br><input type="checkbox"/> Positive                       | <input type="checkbox"/> Negative<br><input type="checkbox"/> Positive                       | <input type="checkbox"/> Resistant H <input type="checkbox"/> Resistant R<br><input type="checkbox"/> Resistant Z <input type="checkbox"/> Resistant E<br><input type="checkbox"/> Resistant S |                                                                                                                                                                                                     |               |
| <input type="checkbox"/> Not Done<br><input type="checkbox"/> Done<br>Date ...../...../..... | <input type="checkbox"/> Not Done<br><input type="checkbox"/> Done<br>Date ...../...../..... | <input type="checkbox"/> Not Done<br><input type="checkbox"/> Done<br>Date ...../...../.....                                  | <input type="checkbox"/> Not Done<br><input type="checkbox"/> Done<br>Date ...../...../..... | <input type="checkbox"/> Not Done<br><input type="checkbox"/> Done<br>Date ...../...../..... | <input type="checkbox"/> Not Done<br><input type="checkbox"/> Done<br>Date ...../...../.....                                                                                                   | <input type="checkbox"/> TB Code _____<br><input type="checkbox"/> MDRTB Code _____<br><input type="checkbox"/> IPT Code _____<br><input type="checkbox"/> No TB<br><input type="checkbox"/> No IPT |               |
| Size mm .....                                                                                | <input type="checkbox"/> Normal<br><input type="checkbox"/> Abnormal                         | <input type="checkbox"/> MTB Not Detected<br><input type="checkbox"/> MTB Detected<br><input type="checkbox"/> Rif Resistance | <input type="checkbox"/> Negative<br><input type="checkbox"/> Positive                       | <input type="checkbox"/> Negative<br><input type="checkbox"/> Positive                       | <input type="checkbox"/> Resistant H <input type="checkbox"/> Resistant R<br><input type="checkbox"/> Resistant Z <input type="checkbox"/> Resistant E<br><input type="checkbox"/> Resistant S |                                                                                                                                                                                                     |               |
| <input type="checkbox"/> Not Done<br><input type="checkbox"/> Done<br>Date ...../...../..... | <input type="checkbox"/> Not Done<br><input type="checkbox"/> Done<br>Date ...../...../..... | <input type="checkbox"/> Not Done<br><input type="checkbox"/> Done<br>Date ...../...../.....                                  | <input type="checkbox"/> Not Done<br><input type="checkbox"/> Done<br>Date ...../...../..... | <input type="checkbox"/> Not Done<br><input type="checkbox"/> Done<br>Date ...../...../..... | <input type="checkbox"/> Not Done<br><input type="checkbox"/> Done<br>Date ...../...../.....                                                                                                   | <input type="checkbox"/> TB Code _____<br><input type="checkbox"/> MDRTB Code _____<br><input type="checkbox"/> IPT Code _____<br><input type="checkbox"/> No TB<br><input type="checkbox"/> No IPT |               |
| Size mm .....                                                                                | <input type="checkbox"/> Normal<br><input type="checkbox"/> Abnormal                         | <input type="checkbox"/> MTB Not Detected<br><input type="checkbox"/> MTB Detected<br><input type="checkbox"/> Rif Resistance | <input type="checkbox"/> Negative<br><input type="checkbox"/> Positive                       | <input type="checkbox"/> Negative<br><input type="checkbox"/> Positive                       | <input type="checkbox"/> Resistant H <input type="checkbox"/> Resistant R<br><input type="checkbox"/> Resistant Z <input type="checkbox"/> Resistant E<br><input type="checkbox"/> Resistant S |                                                                                                                                                                                                     |               |
| <input type="checkbox"/> Not Done<br><input type="checkbox"/> Done<br>Date ...../...../..... | <input type="checkbox"/> Not Done<br><input type="checkbox"/> Done<br>Date ...../...../..... | <input type="checkbox"/> Not Done<br><input type="checkbox"/> Done<br>Date ...../...../.....                                  | <input type="checkbox"/> Not Done<br><input type="checkbox"/> Done<br>Date ...../...../..... | <input type="checkbox"/> Not Done<br><input type="checkbox"/> Done<br>Date ...../...../..... | <input type="checkbox"/> Not Done<br><input type="checkbox"/> Done<br>Date ...../...../.....                                                                                                   | <input type="checkbox"/> TB Code _____<br><input type="checkbox"/> MDRTB Code _____<br><input type="checkbox"/> IPT Code _____<br><input type="checkbox"/> No TB<br><input type="checkbox"/> No IPT |               |
| Size mm .....                                                                                | <input type="checkbox"/> Normal<br><input type="checkbox"/> Abnormal                         | <input type="checkbox"/> MTB Not Detected<br><input type="checkbox"/> MTB Detected<br><input type="checkbox"/> Rif Resistance | <input type="checkbox"/> Negative<br><input type="checkbox"/> Positive                       | <input type="checkbox"/> Negative<br><input type="checkbox"/> Positive                       | <input type="checkbox"/> Resistant H <input type="checkbox"/> Resistant R<br><input type="checkbox"/> Resistant Z <input type="checkbox"/> Resistant E<br><input type="checkbox"/> Resistant S |                                                                                                                                                                                                     |               |
